# Supplementary material for: TCF7 is highly expressed in immune cells on the atherosclerotic plaques, and regulating inflammatory signaling via NFκB/AKT/STAT1 signaling
Source: Oxford University Press journal article supplement (doi:10.1042/bsr20212064), 2022-07-01
Supplement: bsr-2021-2064_supp.pdf [file bsr-2021-2064_supp.pdf]

**S1A**

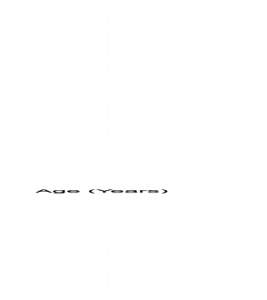

**S1B**

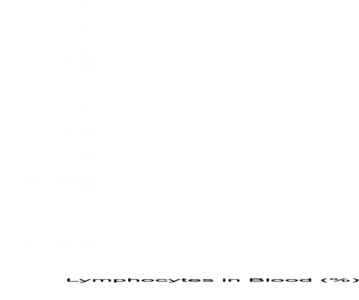

**S1C**

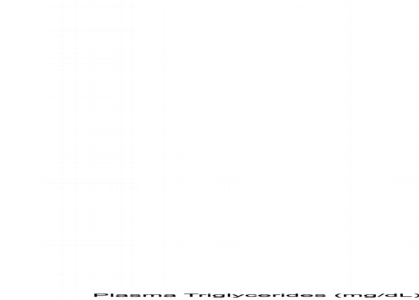

**S1D**

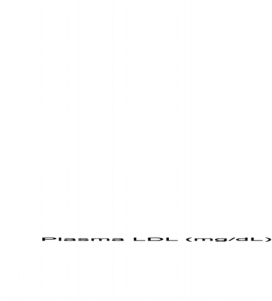

**S1E**

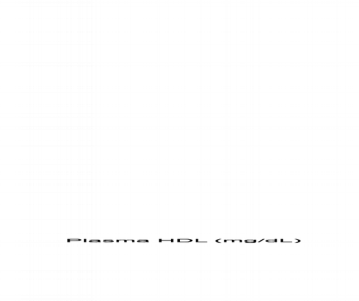

**S1F**

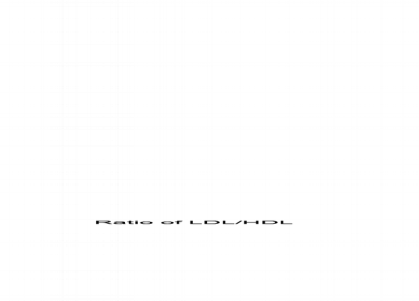

sFigure 1. Clinical characteristics of human.

- (A) Statistics of human age; atherosclerosis patients without asymptomatic (stroke) within 6 months (as ASYM; n = 29); recent stroke patients (as SYM; n = 17).
- (B) Lymphocytes in human blood by Blood Routine Tests. (ASYM n = 29; SYM n = 17).
- (C) The concentration of triglycerides in human plasma (mg/dL). (ASYM n = 29; SYM n = 17).
- (D) The concentration of Low-Density Lipoprotein in human plasma (mg/dL). (ASYM n = 29; SYM n = 17).
- (E) The concentration of High-Density Lipoprotein in human plasma (mg/dL). (ASYM n = 29; SYM n = 17).
- (F) The ratio of LDL/HDL in human. (ASYM n = 29; SYM n = 17).

**S2A**

### Mice Plaque DEGs of CD8<sup>+</sup> T cells

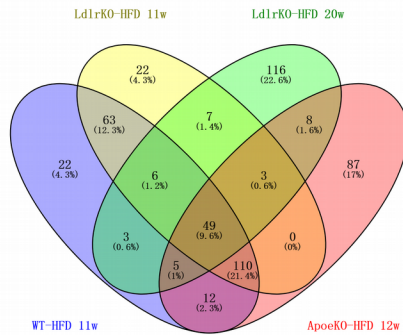**S2B**

WT-HFD 11w

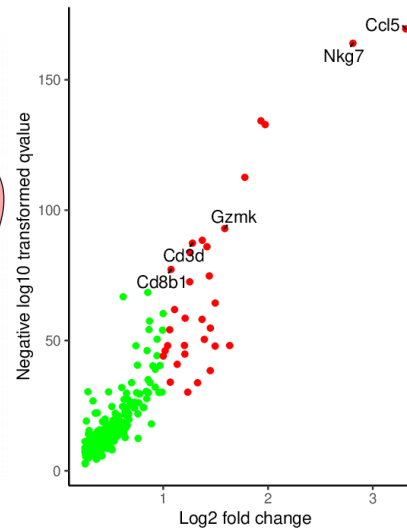

LdlrKO-HFD 11w

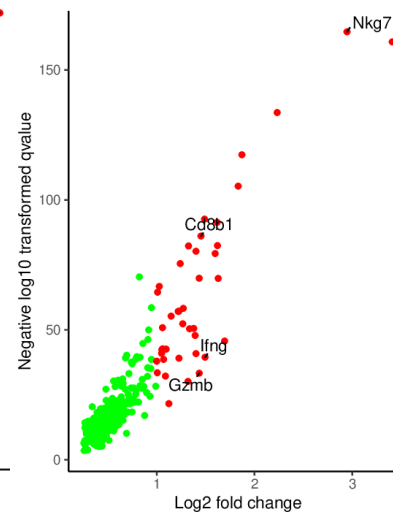

LdlrKO-HFD 20w

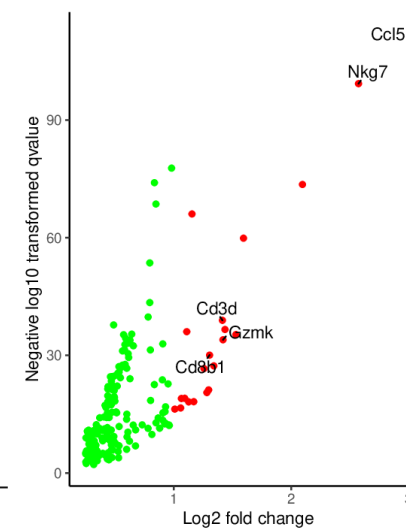

ApoeKO-HFD 12w

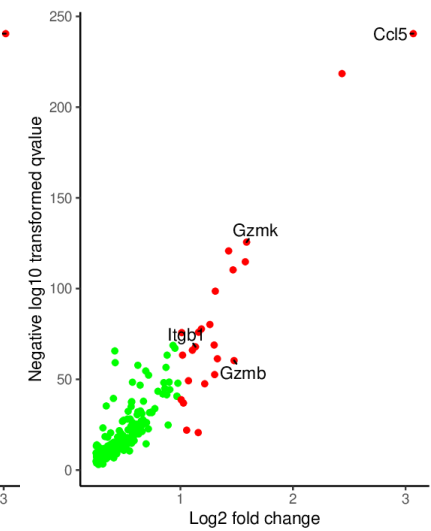**S2C**

### Mice Plaque DEGs of B cells

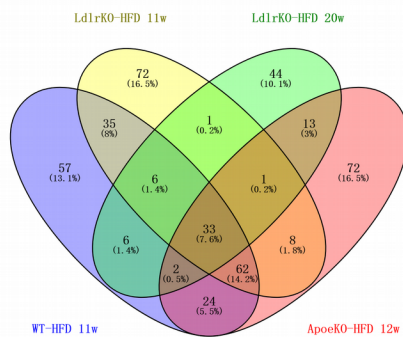**S2D**

WT-HFD 11w

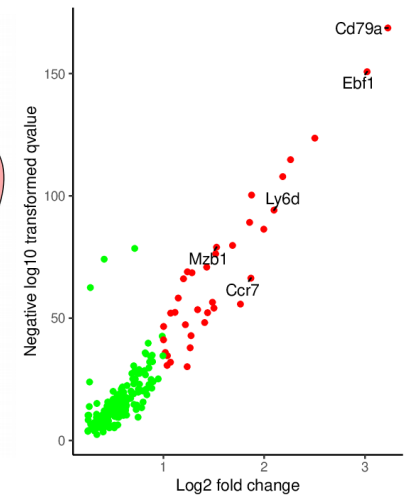

LdlrKO-HFD 11w

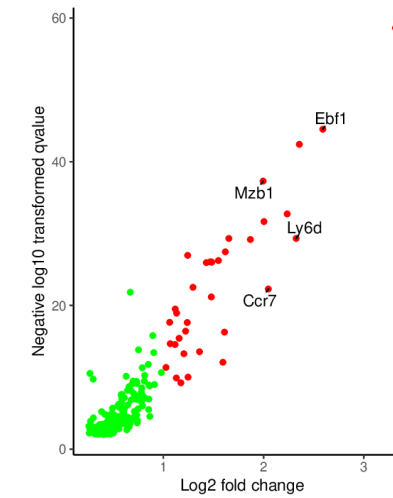

LdlrKO-HFD 20w

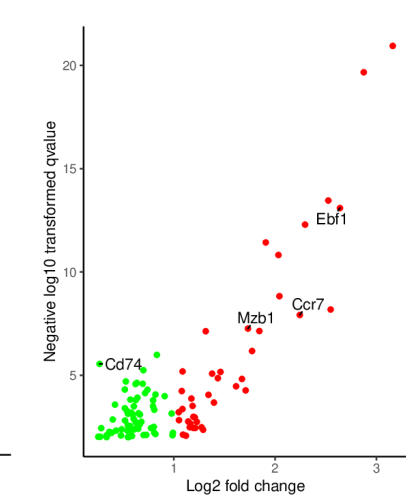

ApoeKO-HFD 12w

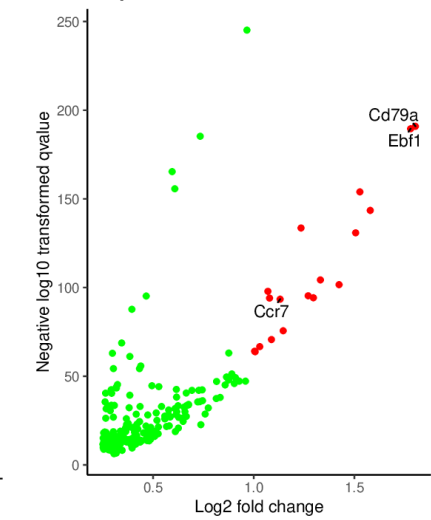

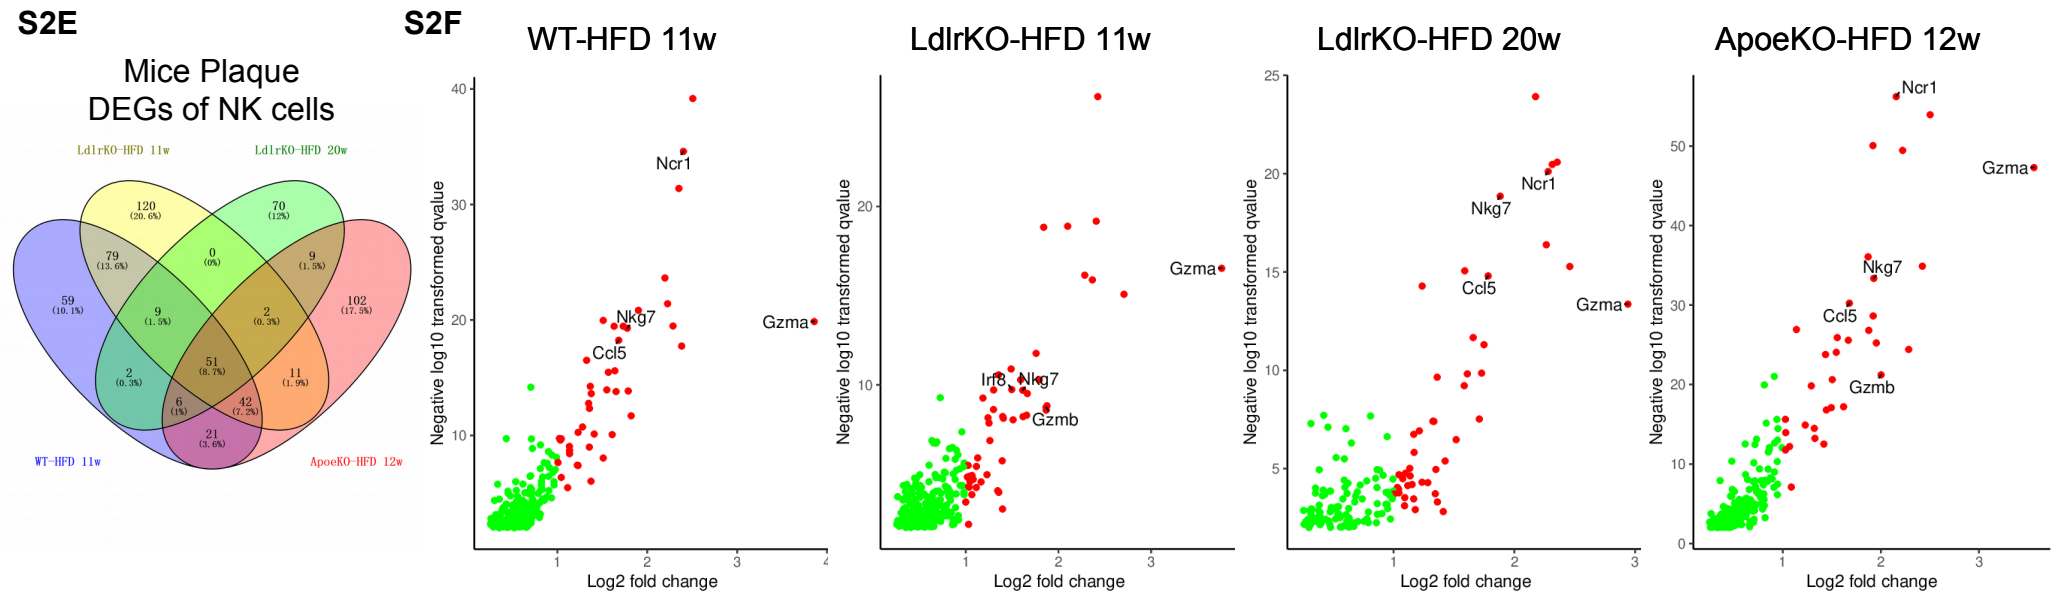

sFigure 2. gene expression of T cells in mice with atherosclerosis

(A) Venny picture showed DEG (Differentially Expressed Gene) of CD8<sup>+</sup> T cells in atherosclerotic plaque among wild type mice, Ldlr-deficiency mice, Apoe-deficiency mice with high fat diet.

(B) Volcano plot showed selected differentially expressed genes in diverse mice plaque of sFigure 1A.

(C) Venny picture showed DEG of B cells in atherosclerotic plaque among wild type mice, Ldlr-deficiency mice, Apoe-deficiency mice with high fat diet.

(D) Volcano plot showed selected differentially expressed genes in diverse mice plaque of sFigure 1C.

(E) Venny picture showed DEG of NK cells in atherosclerotic plaque among wild type mice, Ldlr-deficiency mice, Apoe-deficiency mice with high fat diet.

(F) Volcano plot showed selected differentially expressed genes in diverse mice plaque of sFigure 1E.

**S3A**

Mice Plaque  
DEGs of Monocytes  
WT-HFD 11w

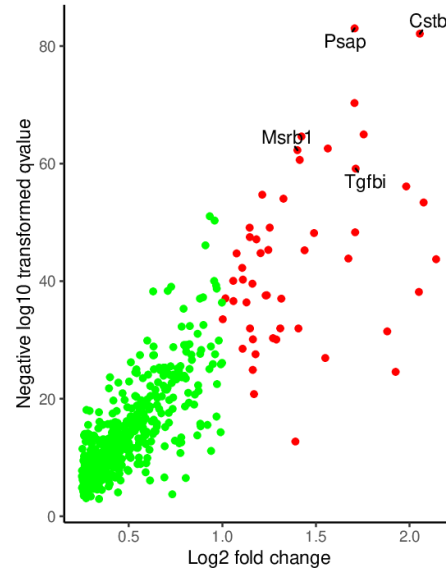

Mice Plaque  
DEGs of Mast cells  
WT-HFD 11w

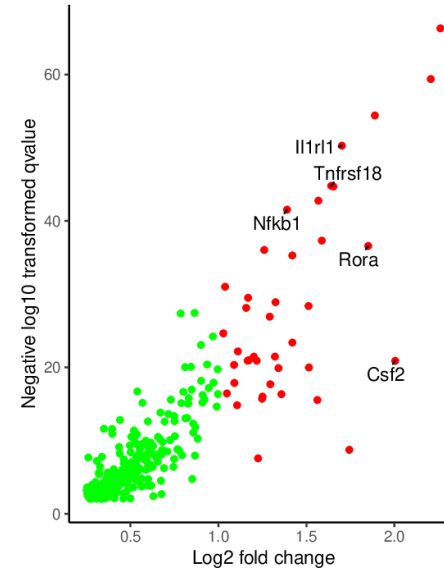

Mice Plaque  
DEGs of Neutrophils  
WT-HFD 11w

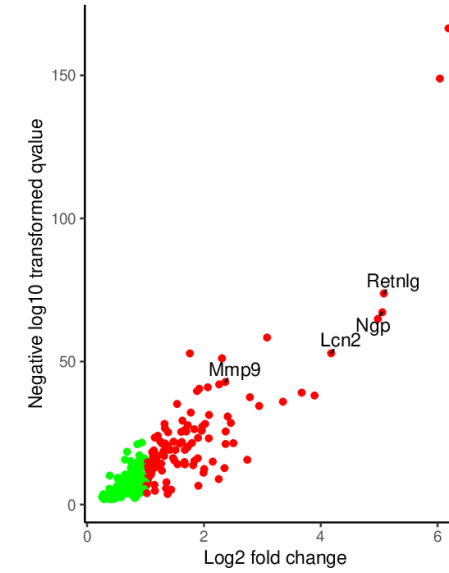

**S3B**

Mice Plaque  
DEGs of Monocytes  
LdlrKO-HFD 11w

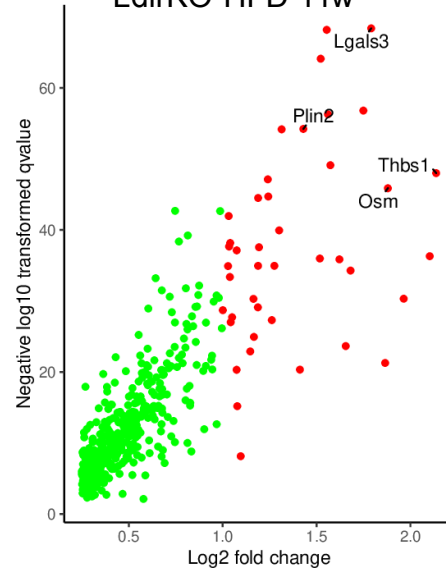

Mice Plaque  
DEGs of Granulocytes  
LdlrKO-HFD 11w

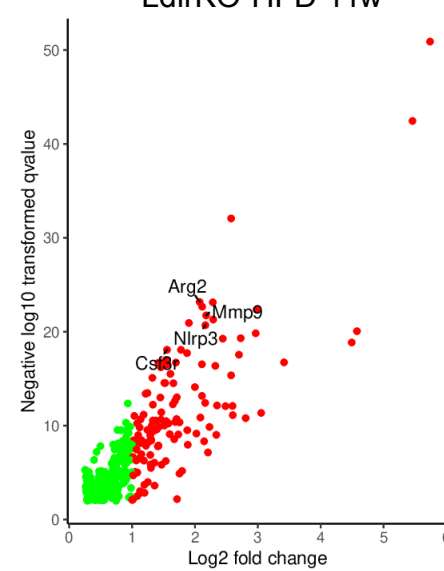

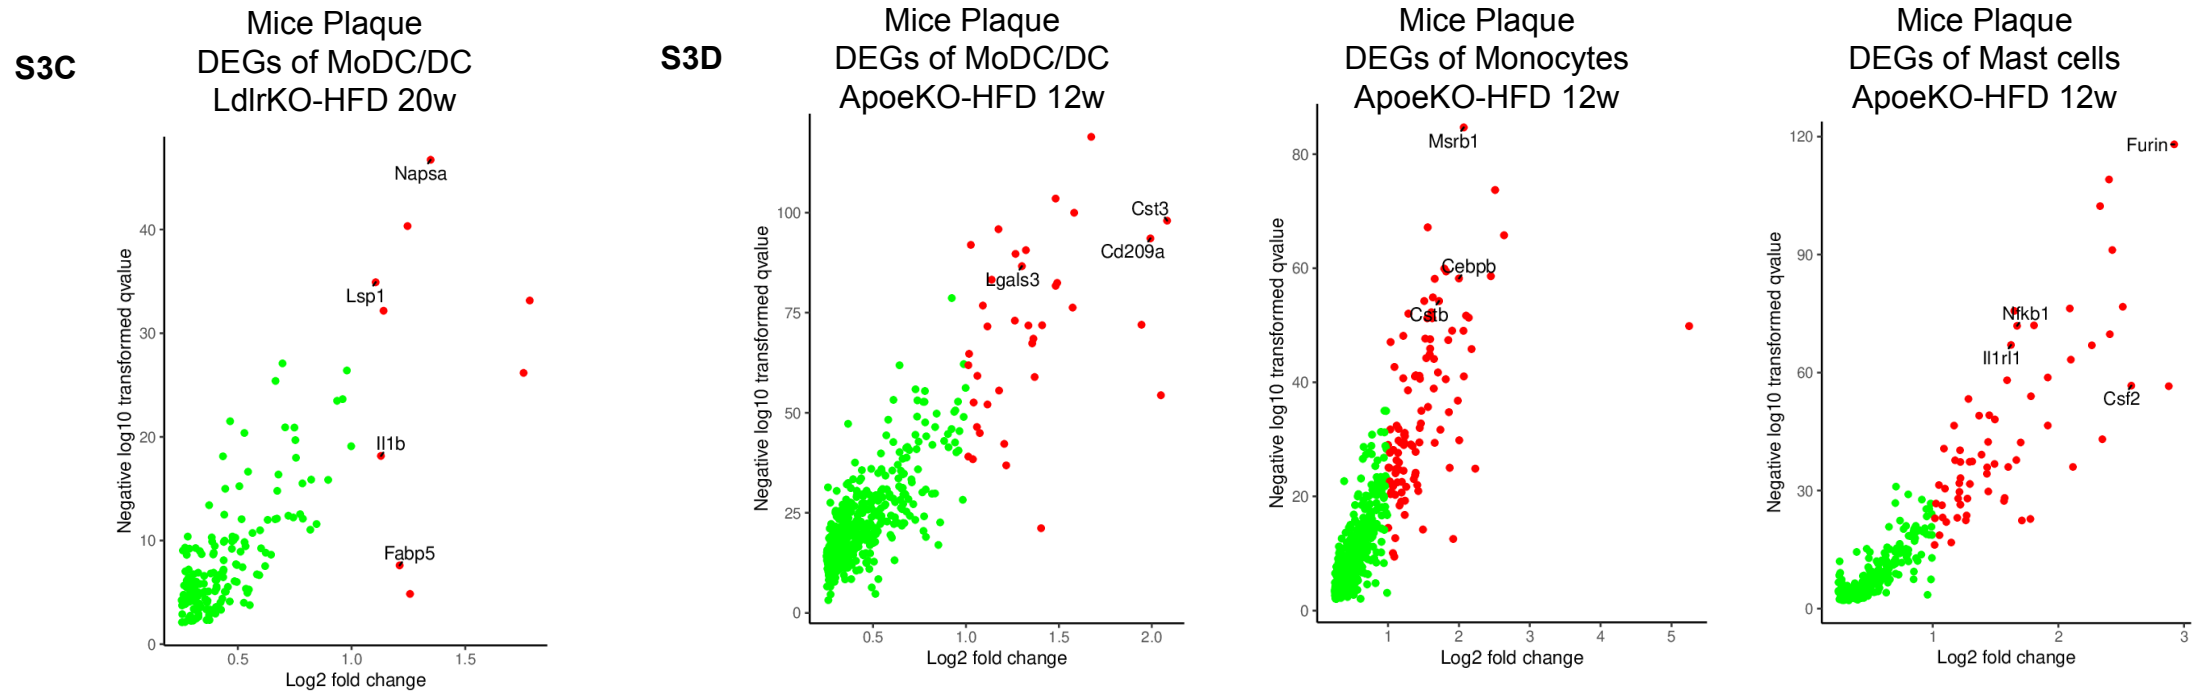

sFigure 3. gene expression of other immune cells in mice with atherosclerosis

- (A) Volcano plot showed selected differentially expressed genes in WT mice with 11 weeks HFD. Monocytes, mast cells and Neutrophils.
- (B) Volcano plot showed selected differentially expressed genes in *Ldlr*-deficiency mice with 11 weeks HFD. Monocytes and Granulocytes.
- (C) Volcano plot showed selected differentially expressed genes in *Ldlr*-deficiency mice with 20 weeks HFD. Monocytes-driven dendric cells.
- (D) Volcano plot showed selected differentially expressed genes in *Apoe*-deficiency mice with 12 weeks HFD. Monocytes-driven dendric cells, Monocytes and mast cells.

S4A

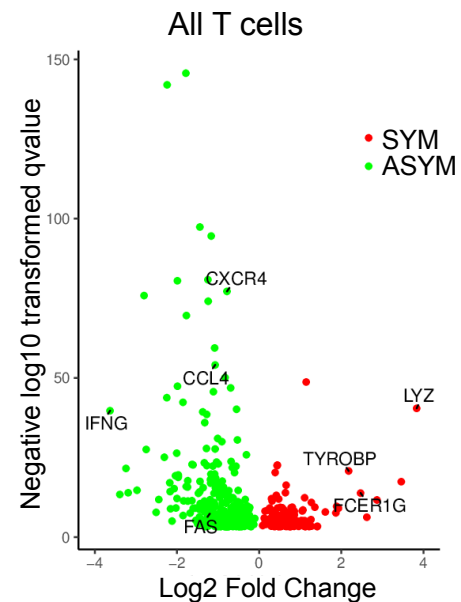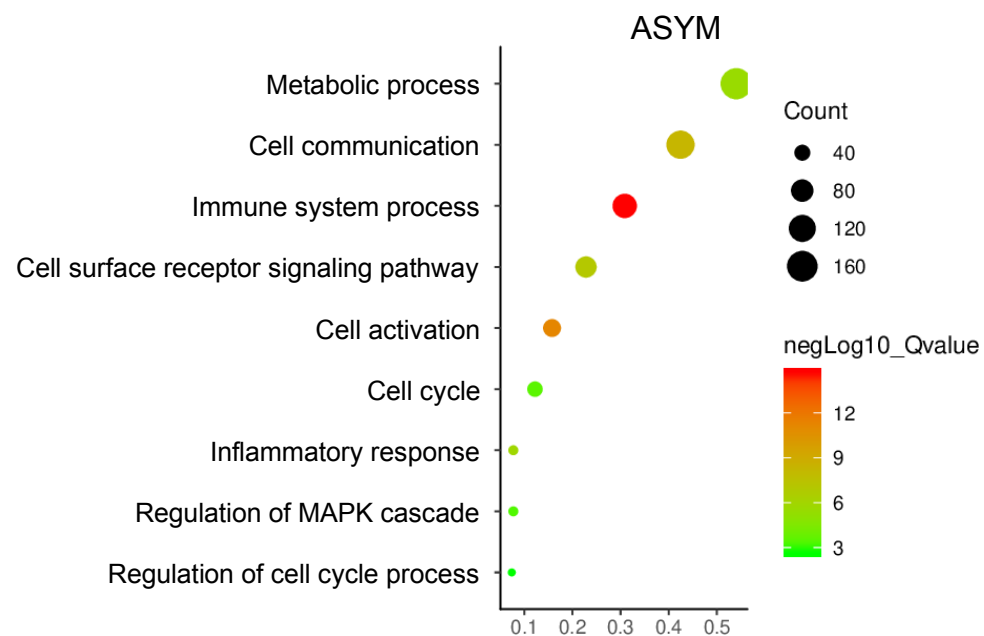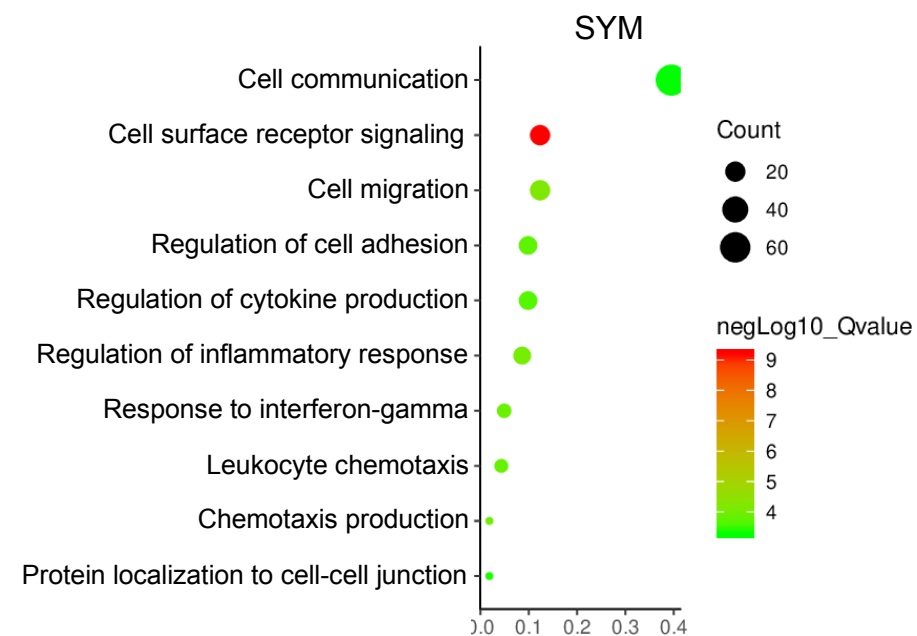

S4B

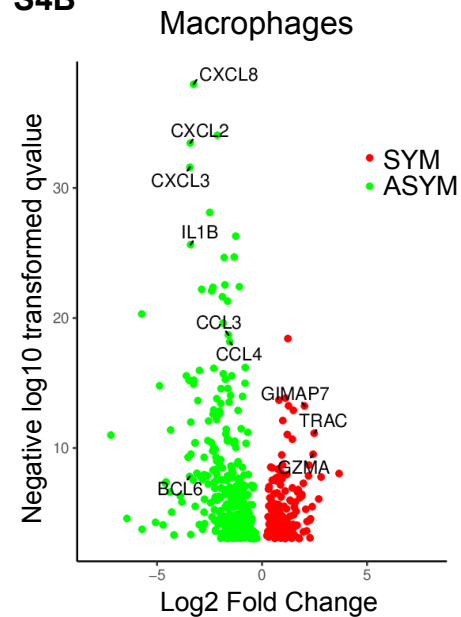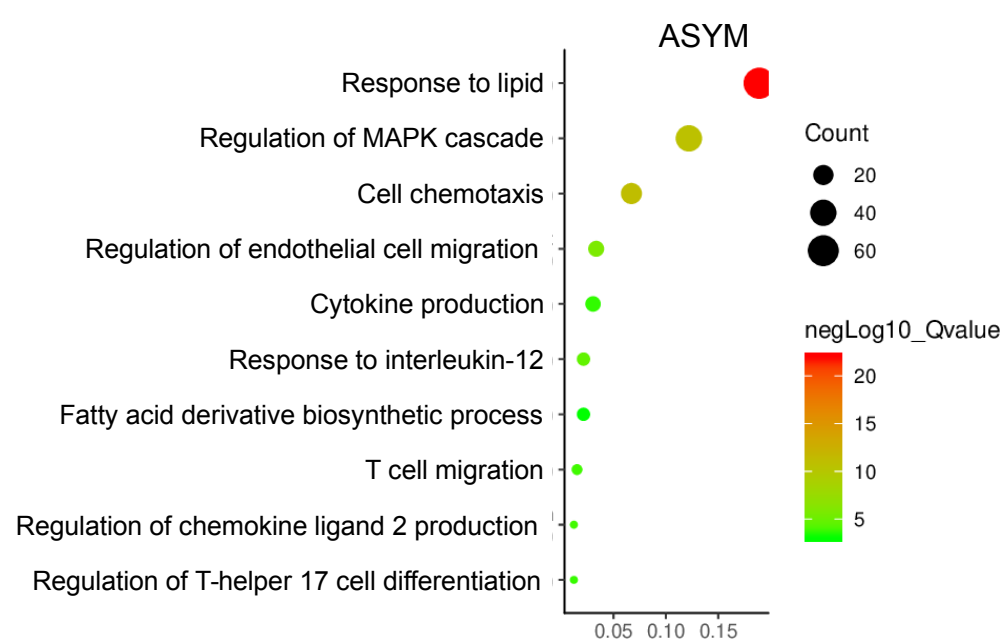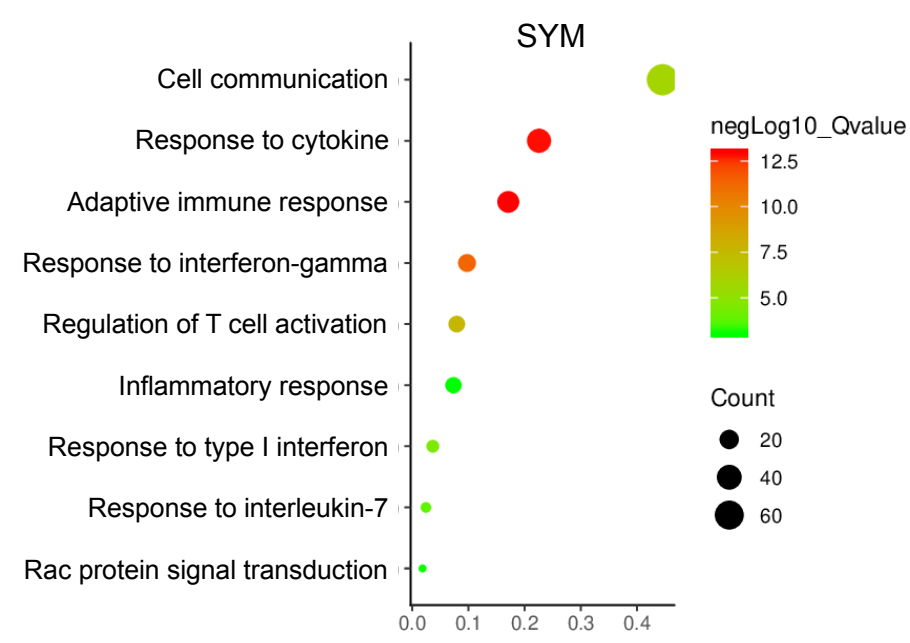

**S4C**

CD8<sup>+</sup> T cells

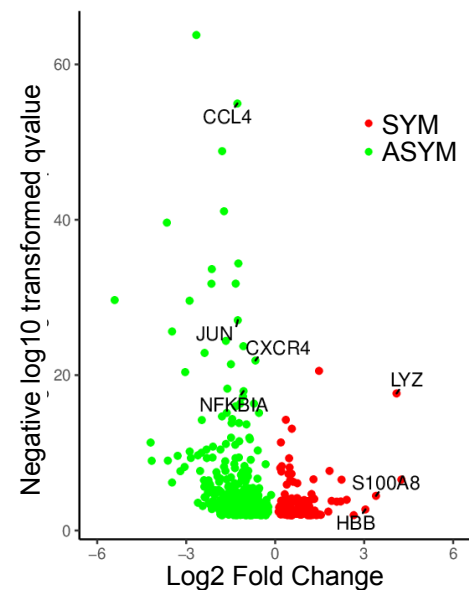

ASYM

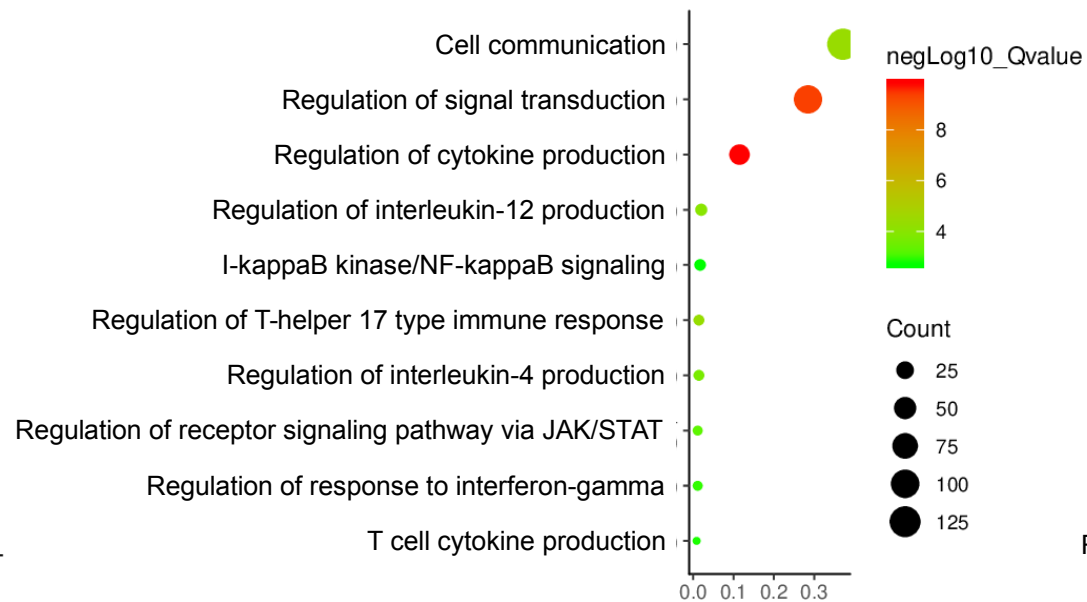

SYM

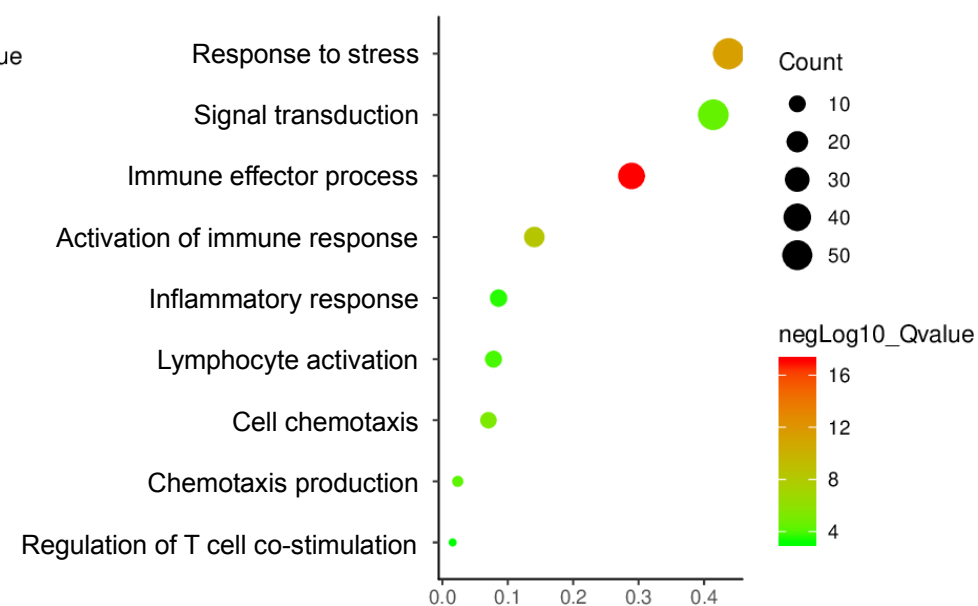

**S4D**

CD4<sup>+</sup> T cells

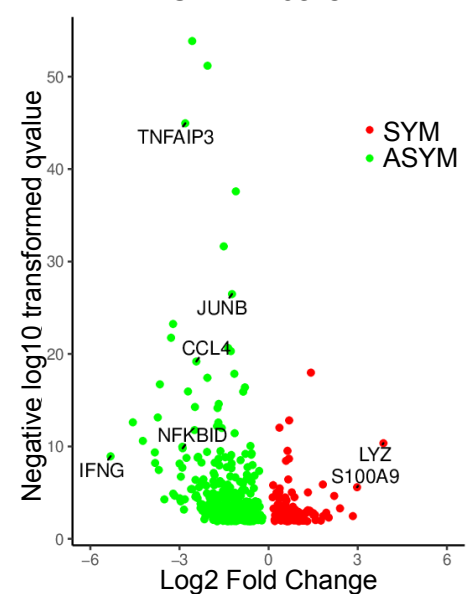

ASYM

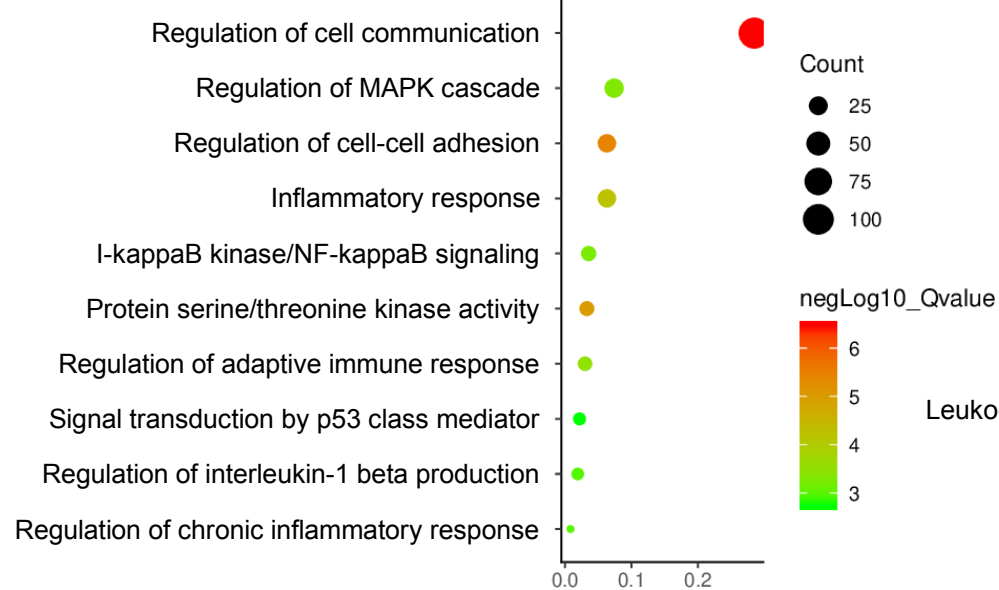

SYM

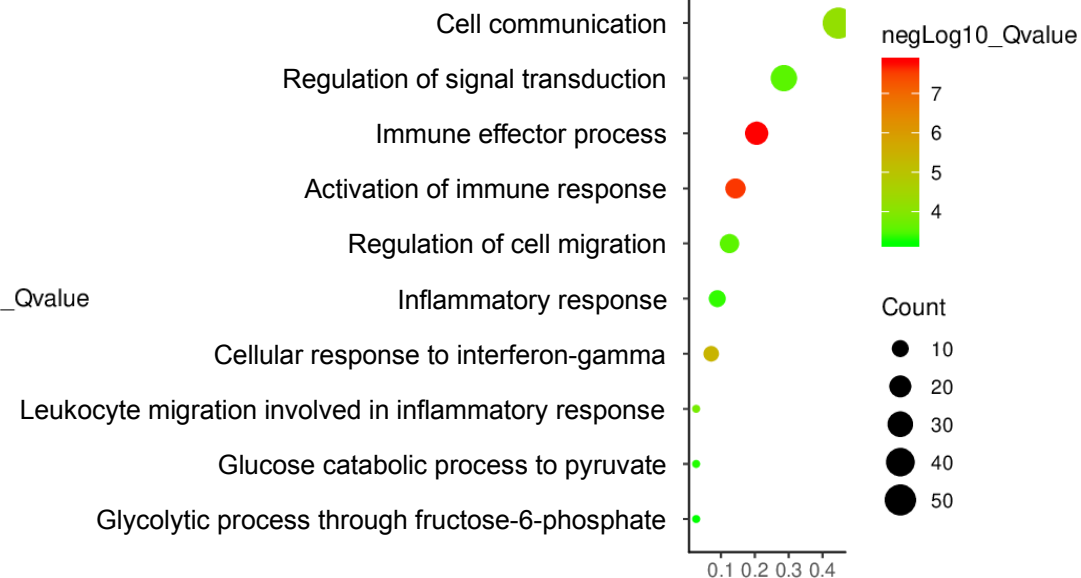

sFigure 4. gene expression of T cells in human with atherosclerosis

- (A) Volcano plot showed selected differentially expressed genes in human and Gene Ontology pathway analysis. All T cells from ASYM and SYM.
- (B) Volcano plot showed selected differentially expressed genes in human and Gene Ontology pathway analysis. macrophages from ASYM and SYM.
- (C) Volcano plot showed selected differentially expressed genes in human and Gene Ontology pathway analysis. CD8<sup>+</sup> T cells from ASYM and SYM.
- (D) Volcano plot showed selected differentially expressed genes in human and Gene Ontology pathway analysis. CD4<sup>+</sup> T cells from ASYM and SYM.



sFigure 5A

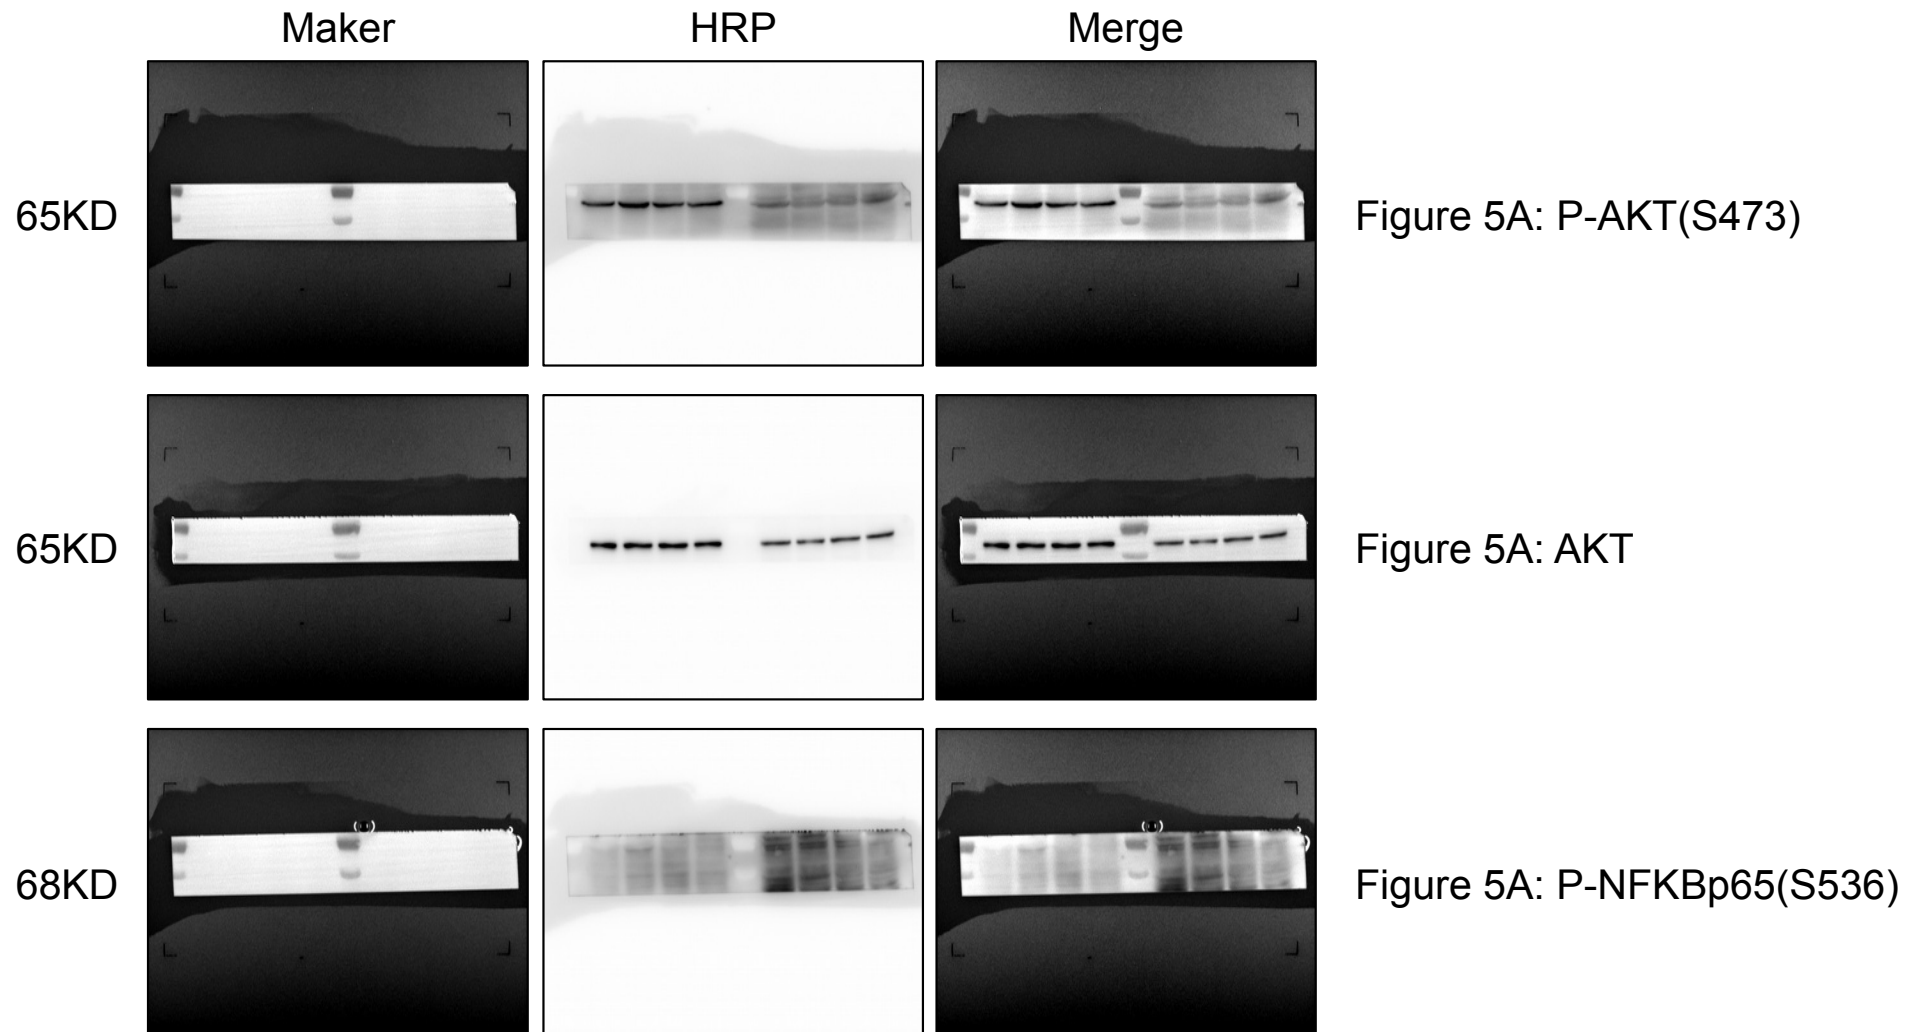

sFigure 5A. Uncropped images of the western blots presented in the Fig.5A  
Maker: PageRuler™ Prestained Protein Ladder, 10 to 180 kDa (#26616, Thermo).  
HRP: Images were acquired using Tanon 5200 by chemiluminescence function.  
Merge: Combine the Marker and HRP images by Tanon software.

sFigure 5B

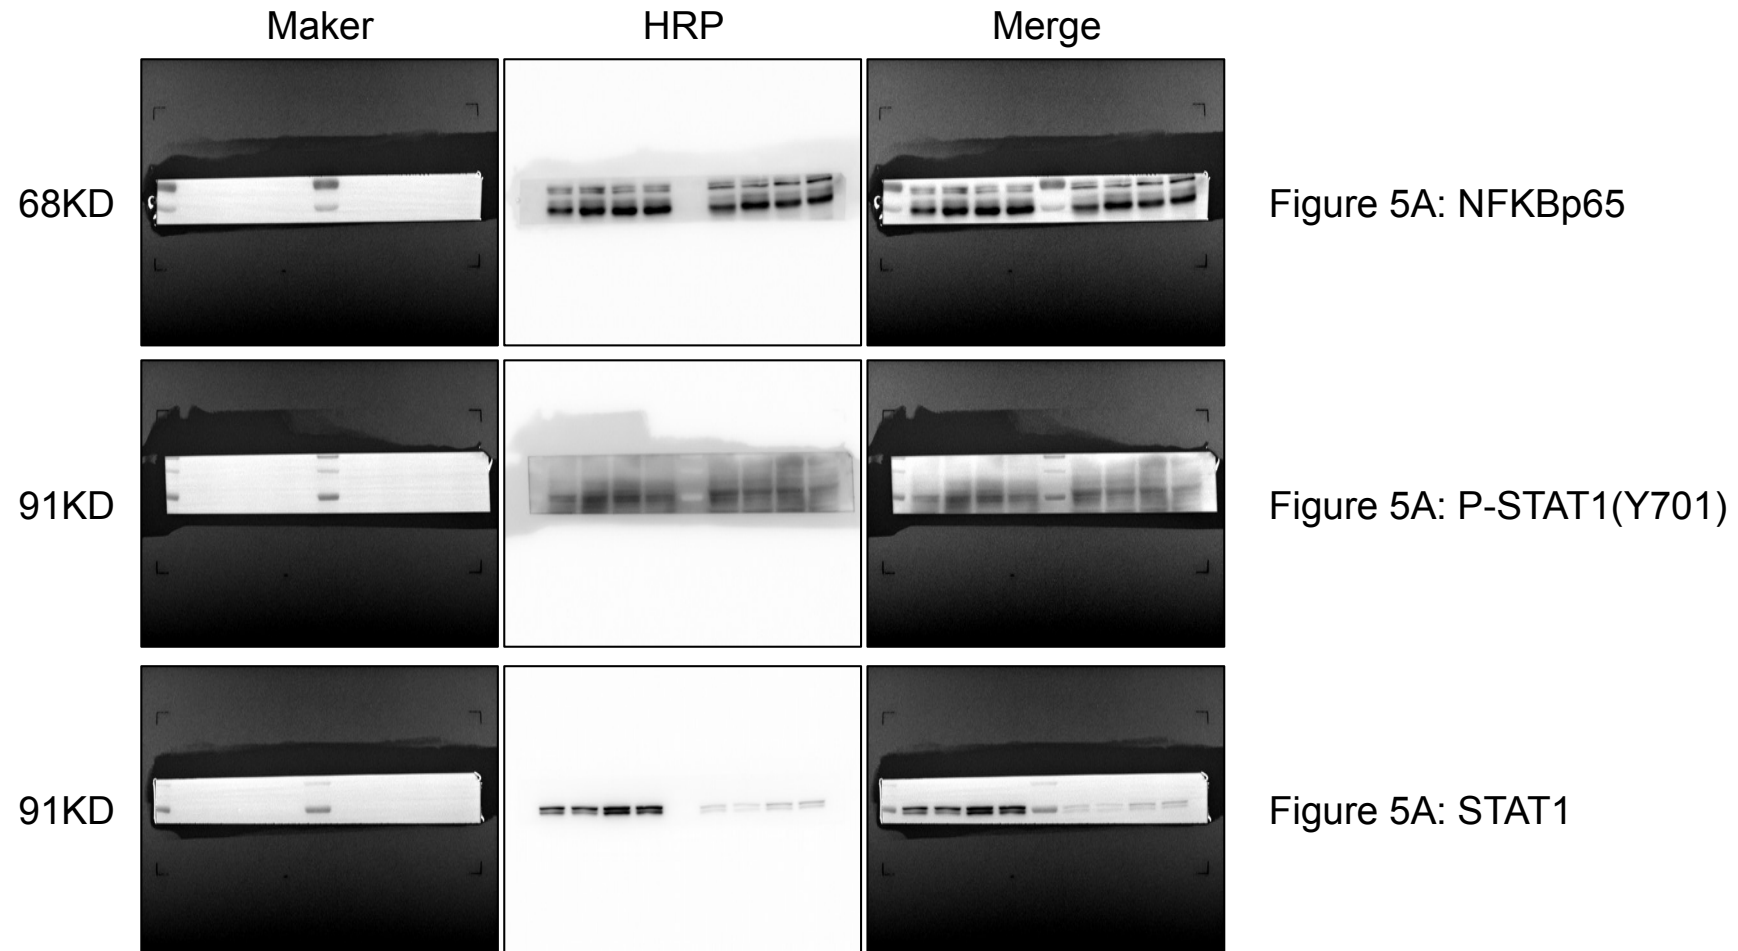

sFigure 5B. Uncropped images of the western blots presented in the Fig.5A  
Maker: PageRuler™ Prestained Protein Ladder, 10 to 180 kDa (#26616, Thermo).  
HRP: Images were acquired using Tanon 5200 by chemiluminescence function.  
Merge: Combine the Marker and HRP images by Tanon software.

sFigure 5C

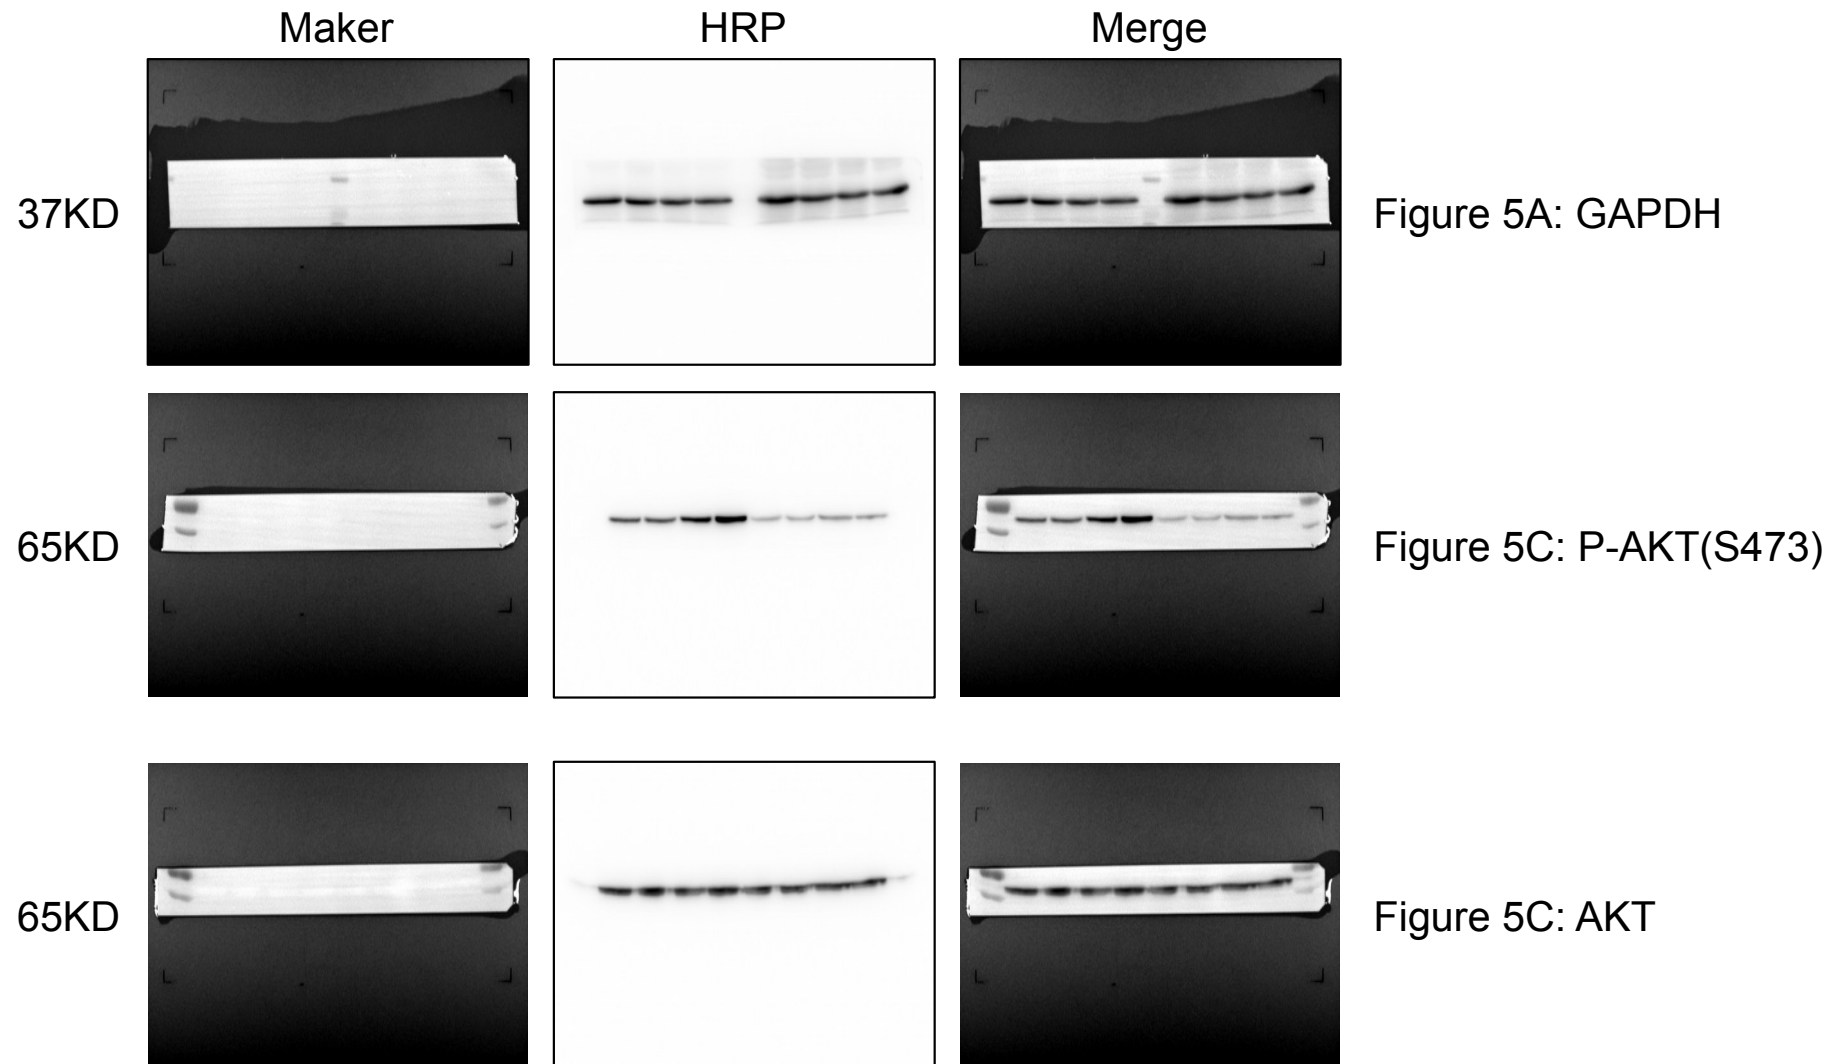

sFigure 5C. Uncropped images of the western blots presented in the Fig.5A & Fig. 5C  
Maker: PageRuler™ Prestained Protein Ladder, 10 to 180 kDa (#26616, Thermo).  
HRP: Images were acquired using Tanon 5200 by chemiluminescence function.  
Merge: Combine the Marker and HRP images by Tanon software.

sFigure 5D

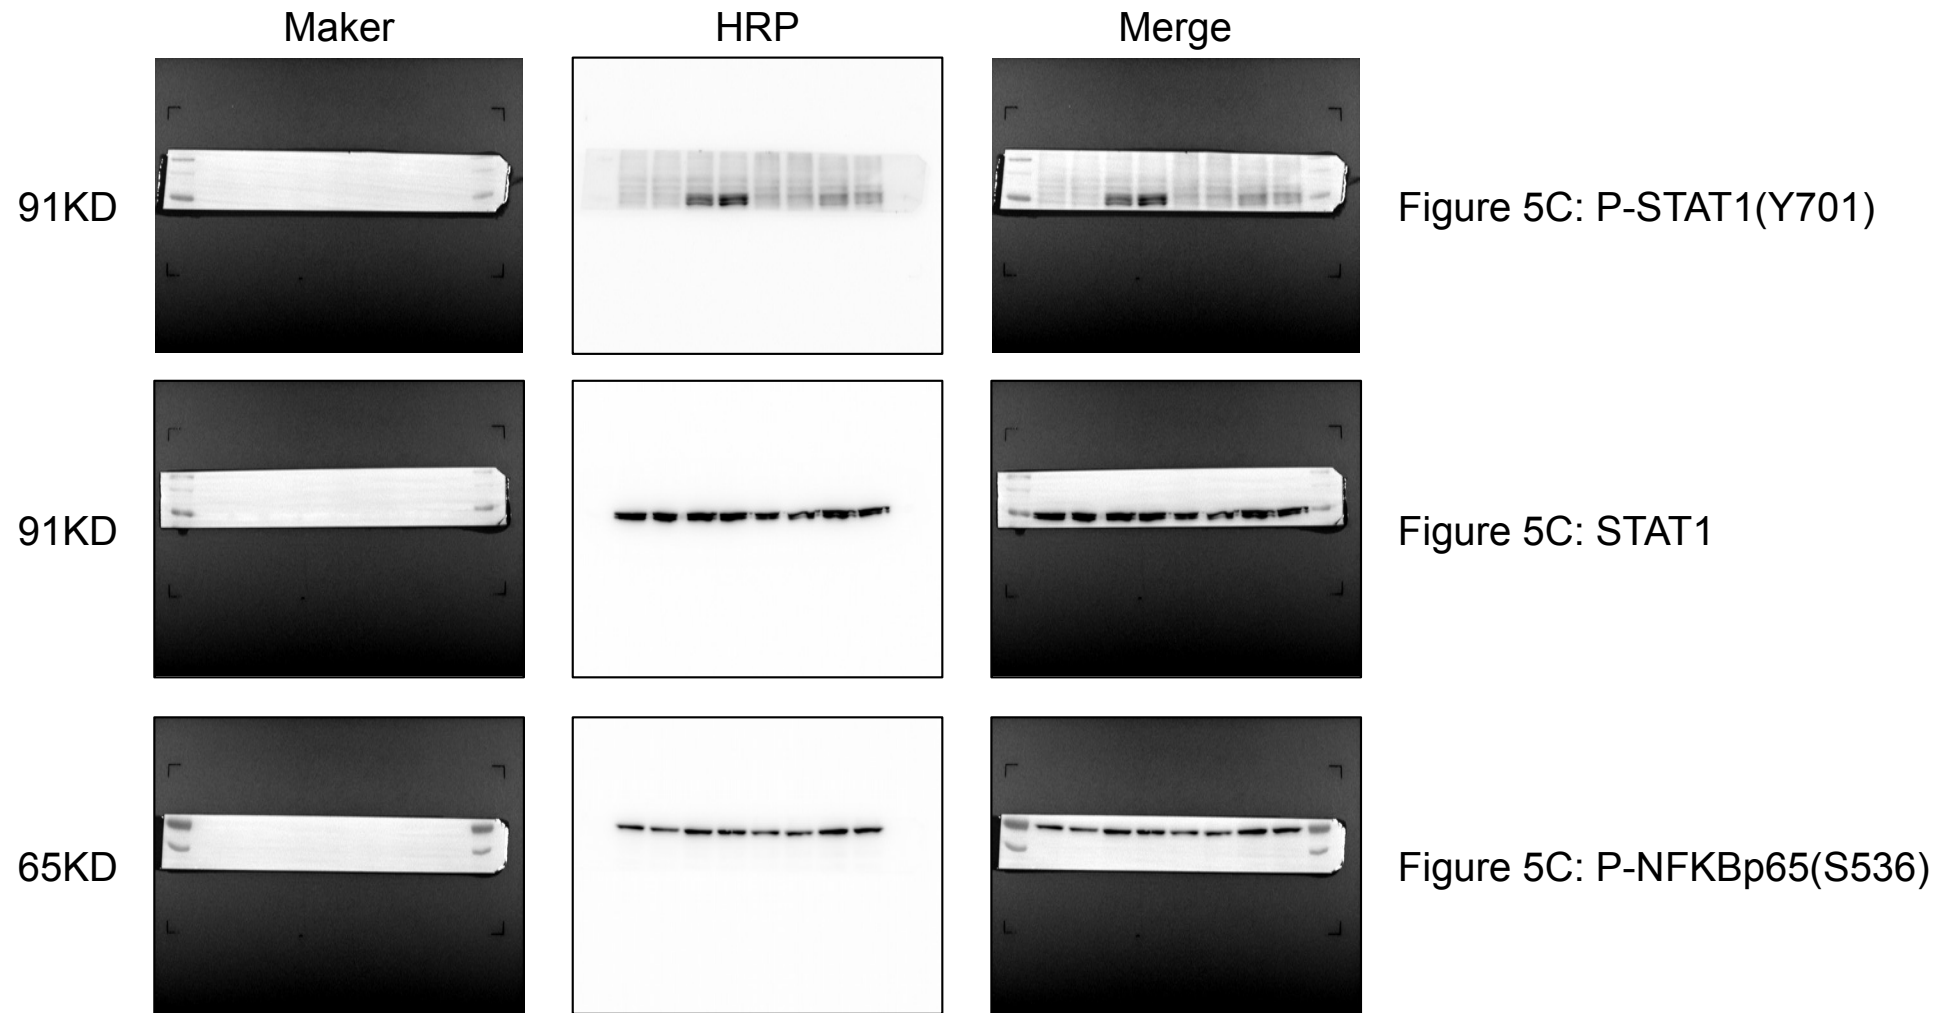

sFigure 5D. Uncropped images of the western blots presented in the Fig.5C  
Maker: PageRuler™ Prestained Protein Ladder, 10 to 180 kDa (#26616, Thermo).  
HRP: Images were acquired using Tanon 5200 by chemiluminescence function.  
Merge: Combine the Marker and HRP images by Tanon software.

sFigure 5E

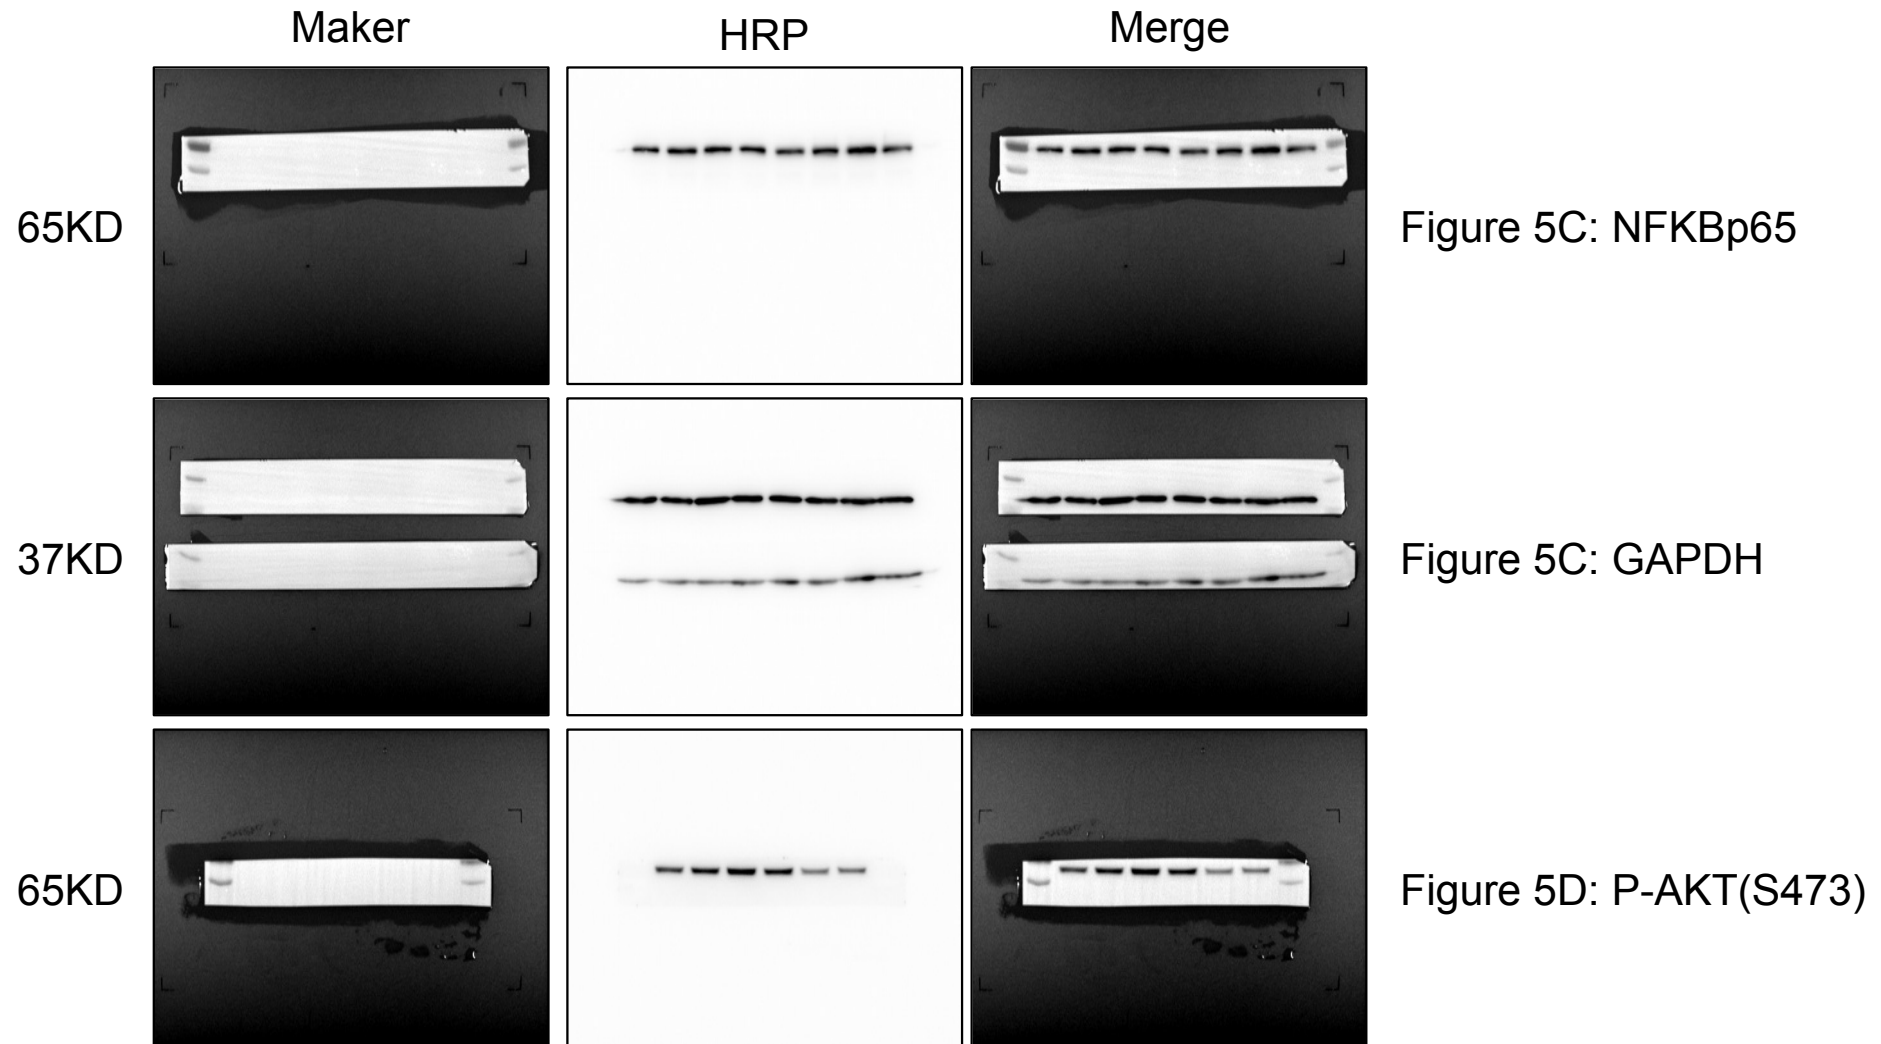

sFigure 5E. Uncropped images of the western blots presented in the Fig.5C & Fig.5D

Maker: PageRuler™ Prestained Protein Ladder, 10 to 180 kDa (#26616, Thermo).

HRP: Images were acquired using Tanon 5200 by chemiluminescence function.

Merge: Combine the Marker and HRP images by Tanon software.

## sFigure 5F

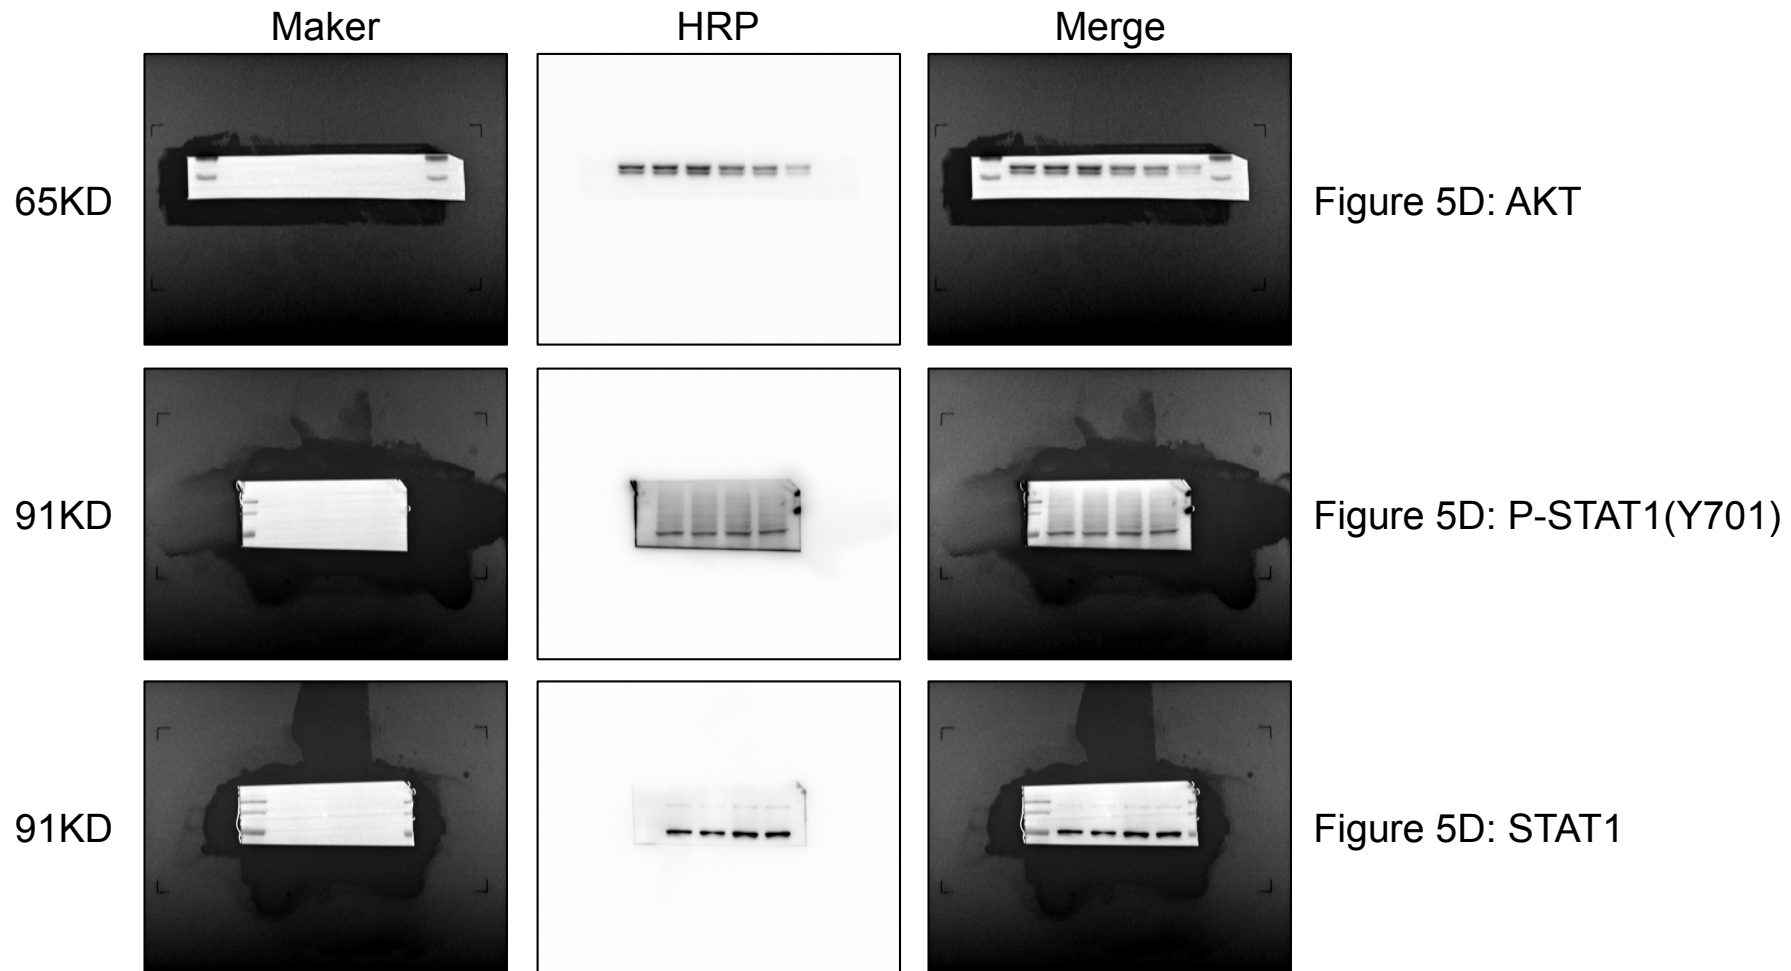

sFigure 5F. Uncropped images of the western blots presented in the Fig.5D  
Maker: PageRuler™ Prestained Protein Ladder, 10 to 180 kDa (#26616, Thermo).  
HRP: Images were acquired using Tanon 5200 by chemiluminescence function.  
Merge: Combine the Marker and HRP images by Tanon software.

## sFigure 5G

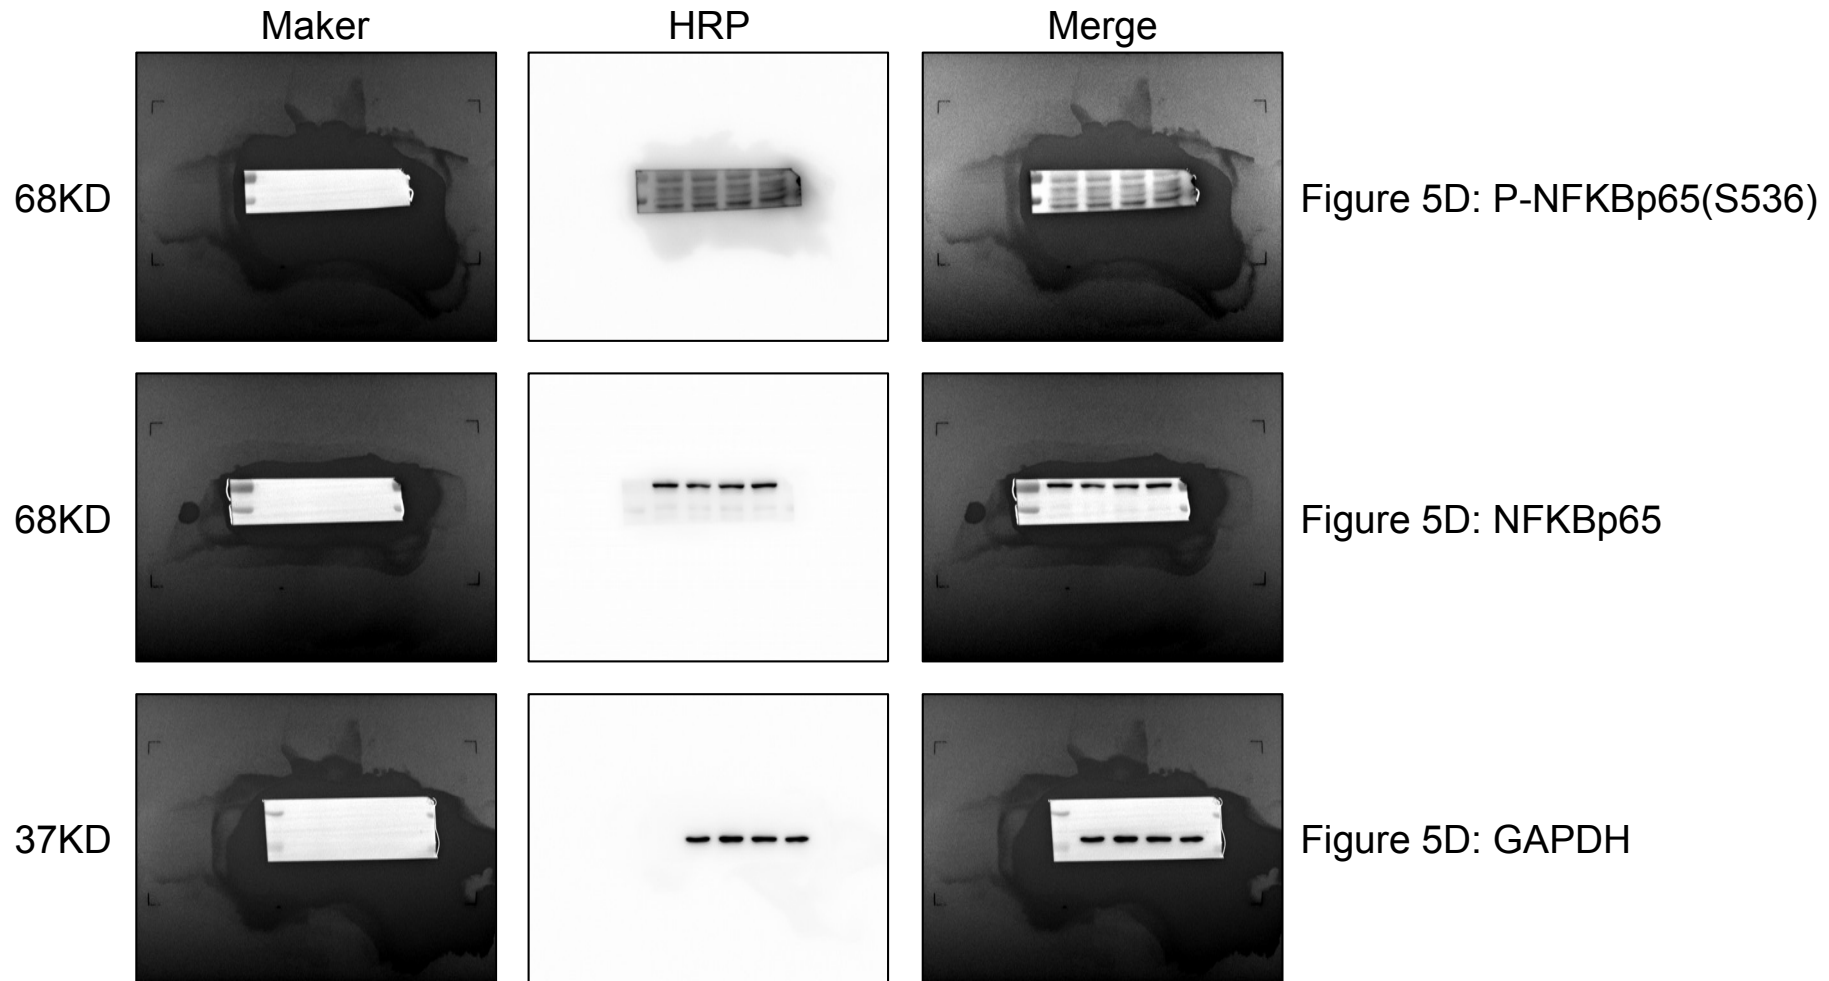

sFigure 5G. Uncropped images of the western blots presented in the Fig.5D  
Maker: PageRuler™ Prestained Protein Ladder, 10 to 180 kDa (#26616, Thermo).  
HRP: Images were acquired using Tanon 5200 by chemiluminescence function.  
Merge: Combine the Marker and HRP images by Tanon software.

Table S1. Clinical characteristics of all patients from database.

Table S2. The proportion of cell types in the results of single cell sequencing.

Table S3. Top 500 Differentially Expressed Genes in T cells/CD8+/CD4+/Macrophages of patients (ASYM and SYM).

Table S4. Top 500 Differentially Expressed Genes in T cells/CD8+/CD4+ of SYM (plaques and blood)

Table S5. GO pathway analysis of T cells/CD8+/CD4+/Macrophages in patients (ASYM and SYM).

Table S6. GO pathway analysis of T cells/CD8+/CD4+ in SYM (plaques and blood).
